# Supplementary material
Source: publisher figshare collection journal article supplement (https://acs.figshare.com/ndownloader/files/6568995)

**Tetrahydrofurantricarboxylic Acid: an Isomerizable  
Framework-Forming Ligand in Homo- and Heterometallic  
Complexes with  $\text{UO}_2^{2+}$ ,  $\text{Ag}^+$  and  $\text{Pb}^{2+}$**

Pierre Thuéry and Jack Harrowfield

**Figure S1.** Solid-state emission spectra of the homometallic complexes of silver(I) (6) and lead(II) (7).

The excitation wavelength was 420 nm.

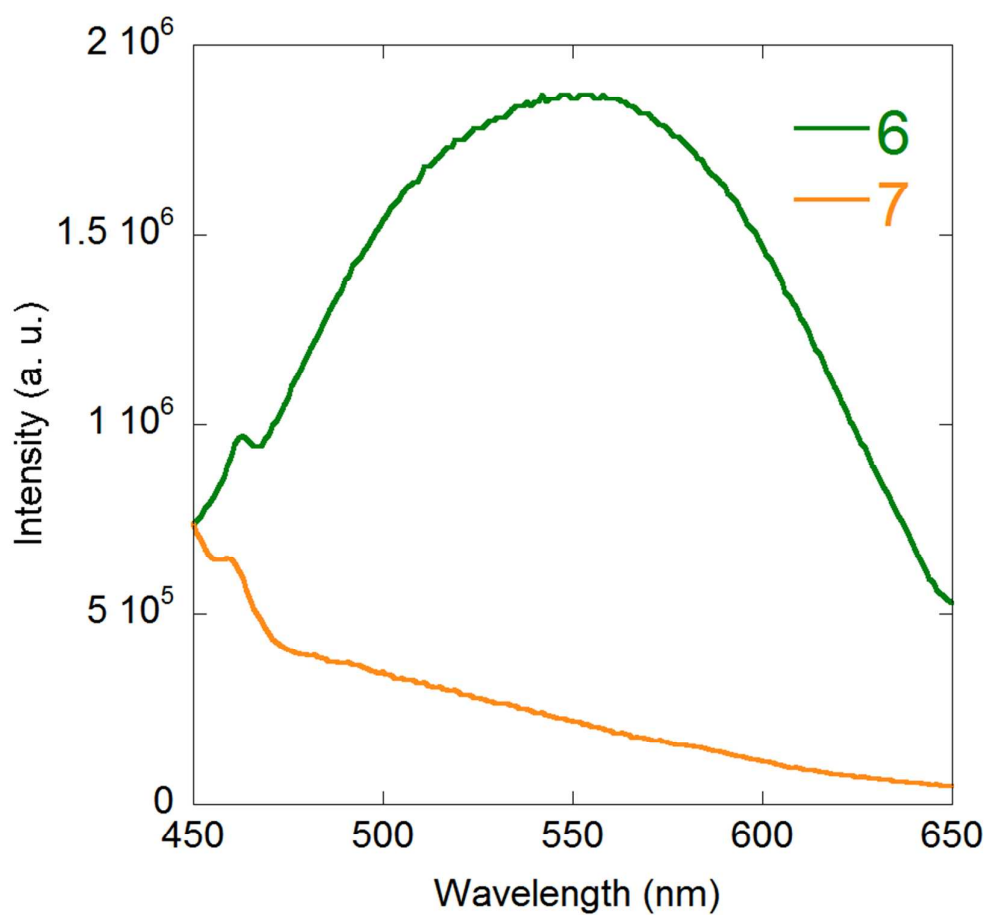

Supplement: Supplementary file 1 [file 6568995]
